# Supplementary material for: International Consensus on Definition of Mild-to-Moderate Ulcerative Colitis Disease Activity in Adult Patients
Source: MDPI journal article supplement (doi:10.3390/medicina59010183), 2023-01-16
Supplement: s1 [file s1]

**Supplementary Table S1. Statements excluded.**

|                                                                                                                                                                                                                                                                                                                                                      |
|------------------------------------------------------------------------------------------------------------------------------------------------------------------------------------------------------------------------------------------------------------------------------------------------------------------------------------------------------|
| Proposed statements                                                                                                                                                                                                                                                                                                                                  |
| The symptom-based items of the Clinical Activity Index (CAI) should be used to assess mild to moderate ulcerative colitis disease activity                                                                                                                                                                                                           |
| The symptom-based items of the Disease Activity Index (DAI) should be used to assess mild to moderate ulcerative colitis disease activity                                                                                                                                                                                                            |
| The presence of abdominal pain/cramps should be used to assess mild to moderate ulcerative colitis disease activity                                                                                                                                                                                                                                  |
| The physician's global assessment (PGA) should be used to assess mild to moderate ulcerative colitis disease activity                                                                                                                                                                                                                                |
| The presence of temperature due to colitis should be used to assess mild to moderate ulcerative colitis disease activity                                                                                                                                                                                                                             |
| The presence of weight loss should be used to assess mild to moderate ulcerative colitis disease activity                                                                                                                                                                                                                                            |
| The presence of nocturnal bowel movements should be used to assess mild to moderate ulcerative colitis disease activity                                                                                                                                                                                                                              |
| The endoscopic-based items of the Disease Activity Index (DAI) should be used to assess mild to moderate ulcerative colitis disease activity                                                                                                                                                                                                         |
| The endoscopic-based items of the Endoscopic Index (EI) should be used to assess mild to moderate ulcerative colitis disease activity                                                                                                                                                                                                                |
| The endoscopic-based items of the Ulcerative Colitis Disease Activity Index (UCDAI) should be used to assess mild to moderate ulcerative colitis disease activity                                                                                                                                                                                    |
| Disease location should be used to define mild to moderate disease activity                                                                                                                                                                                                                                                                          |
| Histologic measurements are important to define mild to moderate ulcerative colitis                                                                                                                                                                                                                                                                  |
| The Geboes Score is an appropriate instrument for classifying disease activity in mild to moderate ulcerative colitis                                                                                                                                                                                                                                |
| The Nancy Score is an appropriate instrument for classifying histologic disease activity in mild to moderate ulcerative colitis                                                                                                                                                                                                                      |
| The Robarts Histopathology Index is an appropriate instrument for classifying histologic disease activity in mild to moderate ulcerative colitis                                                                                                                                                                                                     |
| The modified Riley Index is an appropriate instrument for classifying histologic disease activity in mild to moderate ulcerative colitis                                                                                                                                                                                                             |
| The presence of neutrophils in the epithelium is sufficient to define mild to moderate ulcerative colitis                                                                                                                                                                                                                                            |
| The presence of neutrophils in the epithelium is sufficient to define mild to moderate ulcerative colitis                                                                                                                                                                                                                                            |
| The CRP level is an appropriate marker for classifying disease activity in mild to moderate ulcerative colitis                                                                                                                                                                                                                                       |
| The following definitions of the Clinical Activity Index (CAI) should be used to define mild to moderate ulcerative colitis disease activity: CAI score >4 or CAI score $\geq$ 6 or CAI score <14 or CAI score of 6-12 or CAI score of 4-12                                                                                                          |
| The following definitions of the Disease Activity Index (DAI) should be used to define mild to moderate ulcerative colitis disease activity: DAI score of 4-11 or DAI score of 3-9 including an endoscopic subscore ranging from 1 to 2 or DAI score of 3-11 or DAI score of 4-10 or DAI score of 3-10                                               |
| The following definitions of the symptom-based items of the Ulcerative Colitis Disease Activity Index (UCDAI) should be used to define mild to moderate ulcerative colitis disease activity: UCDAI score of 4-10 including an endoscopic subscore of at least 1 and a PGA $\leq$ 2 or UCDAI score of 3-8 or UCDAI score of 6-8 or UCDAI score of 4-8 |
| The American College of Gastroenterology Guidelines are appropriate for defining mild to moderate ulcerative colitis disease activity (<4 stools/day with intermittent blood in stools, mild occasional urgency, normal hemoglobin, ESR<30 mm/h, CRP elevated, FC >150-200, MES=1, UCEIS= 2-4)                                                       |
| The American Gastroenterology Association Guidelines are appropriate for defining mild to moderate ulcerative colitis disease activity (<4 stools/day with intermittent blood in stools, normal temperature,                                                                                                                                         |

|                                                                                                                                                                                                                                                 |
|-------------------------------------------------------------------------------------------------------------------------------------------------------------------------------------------------------------------------------------------------|
| normal pulse, normal hemoglobin, ESR $\leq$ 30 mm/h, Non-colonic features on radiograph, none clinical signs)                                                                                                                                   |
| The British Society of Gastroenterology Guidelines are appropriate for defining mild to moderate ulcerative colitis disease activity (Mayo score 3-5)                                                                                           |
| The European Crohn's and Colitis Organization Guidelines are appropriate for defining mild to moderate ulcerative colitis disease activity (<4 bloody stools/day, <90 bpm, <37.5°C temperature, >11.5 g/dL hemoglobin, ESR<20 mm/h, CRP normal) |
| Anxiety/depression measurements are important to define mild to moderate ulcerative colitis                                                                                                                                                     |
